# Supplementary material for: White-nose syndrome without borders: Pseudogymnoascus destructans infection tolerated in Europe and Palearctic Asia but not in North America
Source: PubMed Central journal article supplement (PMC4731777; doi:10.1038/srep19829), 2016-01-29
Supplement: srep19829-s1.pdf [file srep19829-s1.pdf]

**White-nose syndrome without borders: *Pseudogymnoascus destructans* infection  
tolerated in Europe and Palearctic Asia but not in North America**

Jan Zukal, Hana Bandouchova, Jiri Brichta, Adela Cmokova, Kamil S. Jaron, Miroslav Kolarik, Veronika Kovacova,  
Alena Kubátová, Alena Nováková, Oleg Orlov, Jiri Pikula, Primož Presetnik, Jurgis Šuba, Alexandra Zahradníková, Jr. &  
Natália Martínková

**Supplementary Table S1. Geographic coordinates of sites investigated for white-nose syndrome and *Pseudogymnoascus destructans* infection.** Presence or absence of the disease was assessed using PCR (to detect the pathogen) and/or UV light trans-illumination or histopathology (to detect WNS lesions). Czech (CZ) bats were sampled between 2012 and 2014 and bats in Latvia (LV), Russia (RU) and Slovenia (SI) in 2014.

| Country | Locality                                            | Latitude | Longitude | PCR | UV | Histo | Screened |
|---------|-----------------------------------------------------|----------|-----------|-----|----|-------|----------|
| CZ      | Sv. Kateřina Mine, Kašperské hory                   | 49.27    | 13.1      | +   | +  | +     | 12       |
| CZ      | Kristína Mine, Kašperské hory                       | 49.13    | 13.58     | +   | +  | -     | 10       |
| CZ      | Ledové sluje Cave, Vranov nad Dýjí                  | 48.88    | 15.84     | +   | +  | +     | 31       |
| CZ      | Nový Hrádek Castle                                  | 48.84    | 15.91     | +   | +  | -     | 2        |
| CZ      | Býčí skála Cave, Moravský kras                      | 49.31    | 16.69     | +   | -  | -     | 1        |
| CZ      | Koňská jáma Cave, Moravský kras                     | 49.36    | 16.71     | +   | -  | -     | 3        |
| CZ      | Kateřinská Cave, Moravský kras                      | 49.36    | 16.71     | +   | +  | +     | 188      |
| CZ      | Stará Drátenická Cave, Moravský kras                | 49.29    | 16.73     | -   | -  | -     | 1        |
| CZ      | Erichova Cave, Moravský kras                        | 49.37    | 16.73     | +   | +  | +     | 3        |
| CZ      | Nová Drátenická Cave, Moravský kras                 | 49.29    | 16.73     | +   | +  | -     | 2        |
| CZ      | Sloupsko-Šošůvské Caves, Moravský kras              | 49.41    | 16.74     | +   | +  | +     | 4        |
| CZ      | Šimon-Juda Mine, Malá Morávka                       | 50.05    | 17.3      | +   | +  | +     | 117      |
| SI      | Puščava Church, Lovrenc na Pohorju                  | 46.55    | 15.42     | +   | +  | +     | 31       |
| SI      | Ajdovska jama Cave, Nemška vas, Krško               | 45.95    | 15.43     | +   | +  | +     | 17       |
| SI      | Završe pri Grobelnem Church, Šentjur                | 46.23    | 15.44     | -   | +  | -     | 1        |
| LV      | Bridge Strikupe (Vaidva) stream, Janmuiza           | 57.38    | 25.26     | -   | -  | -     | 2        |
| LV      | Leila siksparnu Cave, Kazugrava                     | 57.33    | 25.36     | +   | +  | +     | 11       |
| LV      | Daugapils Fortress                                  | 55.89    | 26.49     | +   | +  | +     | 12       |
| RU      | Slyudorudnik 2 Mine, Kyshtym, Chelyabinskaya oblast | 55.68    | 60.35     | +   | +  | +     | 12       |
| RU      | Smolinskaya Cave, Pokrovskoje, Sverdlovskaya oblast | 56.43    | 61.61     | +   | +  | +     | 21       |

**Supplementary Table S2. Model selection with Akaike Information Criterion (AIC).** Host species was treated as a random effect in all models.

| <b>Model</b>                                                   | <b>AIC</b> | <b>ΔAIC</b> |
|----------------------------------------------------------------|------------|-------------|
| <i>Fungal load</i>                                             |            |             |
| community + sampling date + latitude + longitude               | 769.54     |             |
| community + latitude+ longitude                                | 774        | 4.46        |
| community + latitude                                           | 790.93     | 21.39       |
| community                                                      | 796.76     | 27.22       |
| community + sampling date                                      | 797.59     | 28.05       |
| latitude+ longitude                                            | 821.78     | 52.24       |
| sampling date + latitude + longitude                           | 821.91     | 52.37       |
| sampling date + latitude                                       | 822.44     | 52.9        |
| sampling date                                                  | 824.48     | 54.94       |
| <i>Number of WNS lesions</i>                                   |            |             |
| fungus load + sampling date                                    | 381.52     |             |
| fungus load + sampling date + latitude                         | 382.12     | 0.6         |
| fungus load                                                    | 382.84     | 1.32        |
| fungus load + sampling date + latitude + longitude             | 383.8      | 2.28        |
| fungus load + community                                        | 384.37     | 2.85        |
| fungus load + latitude + longitude                             | 384.51     | 2.99        |
| fungus load + community + sampling date + latitude + longitude | 384.94     | 3.42        |
| community + sampling date + latitude + longitude               | 431.13     | 49.61       |

**Supplementary Table S3. Primers used for PCR and sequencing.**

| <b>Locus</b>                                                                | <b>Primer</b>  | <b>Primer sequence 5' to 3'</b> | <b>Sequence length [bp]</b> | <b>Original reference for primer</b> | <b>Reference for PCR protocol</b> |
|-----------------------------------------------------------------------------|----------------|---------------------------------|-----------------------------|--------------------------------------|-----------------------------------|
| Nuclear ITS and partial LSU rDNA ( <i>ITS</i> )                             | ITS1F          | CTTGGTCATTTAGAG<br>GAAGTAA      | 910                         | Gardes and Bruns (1993)              | Minnis et al. (2013)              |
|                                                                             | ITS4           | TCCGCCGCTTATTGAT<br>ATGC        |                             | White et al. (1990)                  |                                   |
| Translation elongation factor-1 $\alpha$ ( <i>TEF1<math>\alpha</math></i> ) | EF1-983F       | GCYCCYGGHCAAYCGT<br>GAYTTYAT    | 1038                        | Rehner and Buckley (2005)            | Minnis et al. (2013)              |
|                                                                             | EF1-2218R      | ATGACACCRACRGCR<br>ACRGTYTG     |                             | Rehner and Buckley (2005)            |                                   |
| $\beta$ -tubulin ( <i>TUB2</i> )                                            | T1             | AACATGCGTGAGATT<br>GTAAGT       | 400                         | Odonnell and Cigel'nik (1997)        | Pařoutov et al. (2015)           |
|                                                                             | T10            | ACGATAGGTTACCT<br>CCAGAC        |                             | Odonnell and Cigel'nik (1997)        |                                   |
| MAT1-1-1 mating type ( <i>MAT1-1-1</i> )                                    | JP Pd MAT1-2-1 | TCTCAGCTATAGTTT                 | 523                         | Palmer et al. (2014)                 | Palmer et al. (2014)              |
|                                                                             | IntF           | GCACCAA                         |                             |                                      |                                   |
|                                                                             | JP Pd MAT1-2-1 | CATGCATGGGTATCA                 |                             |                                      |                                   |
|                                                                             | IntR           | AAGCG                           |                             |                                      |                                   |
| MAT1-2-1 mating type ( <i>MAT1-1-1</i> )                                    | JP Gd MAT1-1   | AACAGGATCCGTTCA                 | 160                         | Palmer et al. (2014)                 | Palmer et al. (2014)              |
|                                                                             | 400F           | AAGCG                           |                             |                                      |                                   |
|                                                                             | JP Gd MAT1-1   | TGCCATGCCAAGAGG                 |                             |                                      |                                   |
|                                                                             | 400R           | GTCC                            |                             |                                      |                                   |
| Calmodulin                                                                  | CF1            | GCCGACTCTTTGACY                 | 789                         | Peterson et al. 2005                 | Novkov et al. (2014)            |

---

|       |     |               |                      |
|-------|-----|---------------|----------------------|
| (CAM) |     | GARGAR        |                      |
|       | CF4 | TTTTYTGATCATR | Peterson et al. 2005 |
|       |     | AGYTGGAC      |                      |

---

### References from Supplementary Table S3

- Gardes M., Bruns T.D. (1993): ITS primers with enhanced specificity for basidiomycetes--application to the identification of mycorrhizae and rusts. *Mol. Ecol.* 2: 113-118.
- Nováková A., Hubka V., Dudová Z., Matsuzawa T., Kubátová A., Yaguchi T. and Kolařík M. (2014): New species in *Aspergillus* section Fumigati from reclamation sites in Wyoming (U.S.A.) and revision of *A. viridinutans* complex. *Fungal Diversity* 64: 253-274.
- Palmer J.M., Kubatova A., Novakova A., Minnis A.M., Kolarik M. and Lindner D.L. (2014): Molecular characterization of a heterothallic mating system in *Pseudogymnoascus destructans*, the fungus causing white-nose syndrome of bats. *G3: Genes, Genomes, Genetics* 4: 1755-1763.
- Pažoutová S., Pešicová K., Chudíčková M., Šrůtka P. and Kolařík M. (2015): Delimitation of cryptic species inside *Clavicepspurpurea*. *Fungal Biology* 119: 7-26.
- Peterson S.W., Vega F.E. and Posada F. (2005): *Penicillium coffeae*, a new endophytic species isolated from a coffee plant and its phylogenetic relationship to *P. fellutanum*, *P. thiersii* and *P. brocae* based on parsimony analysis of multilocus DNA sequences. *Mycologia* 97: 659-666.
- O'donnell K., Cigelnik E. (1997): Two divergent intragenomic DNA ITS2 types within a monophyletic lineage of the fungus *Fusarium* are nonorthologous. *Mol. Phylogen. Evol.* 7: 103-116.
- Rehner S.A., Buckley E. (2005): A *Beauveria* phylogeny inferred from nuclear ITS and EF1- $\alpha$  sequences: Evidence for cryptic diversification and links to *Cordyceps* teleomorphs. *Mycologia* 97: 84-98.

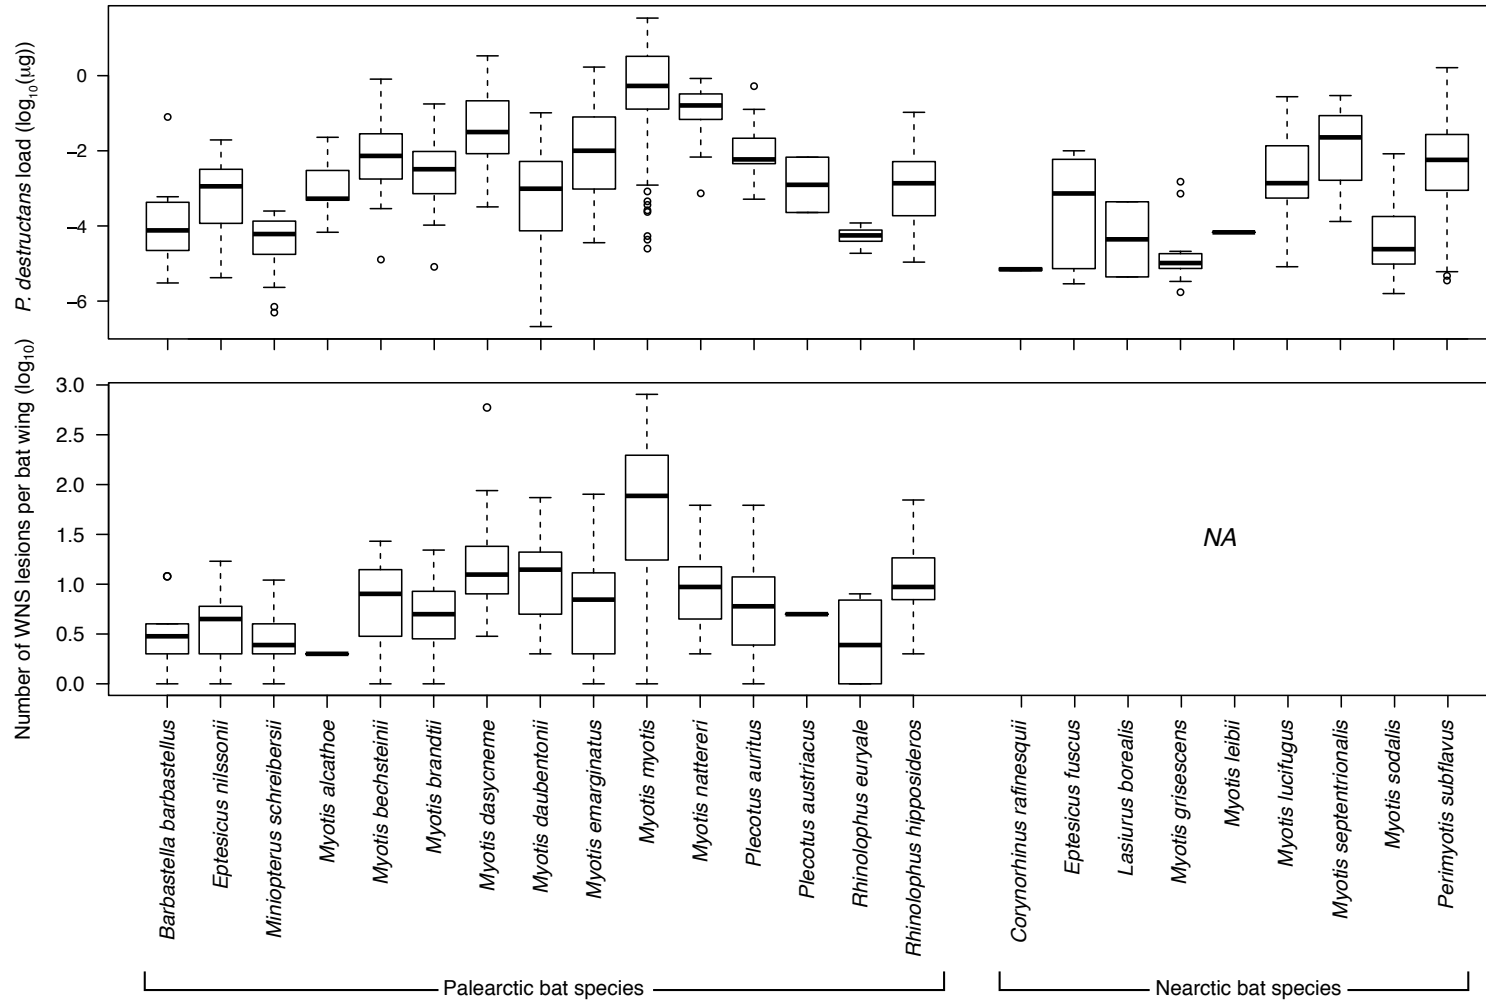

**Supplementary Fig. S1. *Pseudogymnoascus destructans* fungal loads in bats from the Palearctic (Czech Republic, Latvia, Slovenia, Russia) and the Nearctic (USA).** Data from Palearctic bats were detected using quantitative PCR across the dorsal side of the left wing and the number of WNS lesions using UV light trans-illumination. See main text for details on fungal load acquisition from Nearctic bats and the text and Table 1 for respective sample sizes. NA – not available.

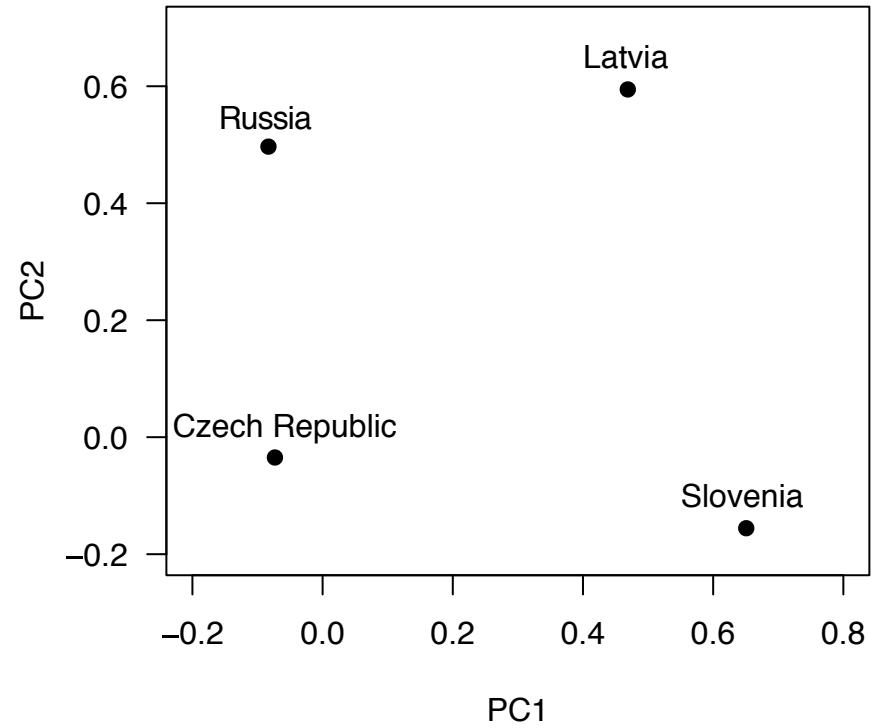

**Supplementary Fig. S2. Relatedness of regional hibernating bat communities.** Principal component analysis was calculated from mean phylogenetic and mean nearest taxon distances and UniFrac metric of specific bat communities at hibernacula at the given region.
